# Supplementary material
Source: MDPI journal article supplement (https://www.mdpi.com/2072-4292/10/4/629)
Supplement: s1 [file s1 › remotesensing-280962-SI.pdf]

Equation (S1): The equation used to calculate the Shannon Diversity Index is as follows [58,59]:

$$H' = - \sum_{i=1}^S p_i \ln p_i \quad (S1)$$

where;

$H'$  = Calculated Shannon diversity index

$p_i$  = proportion of individuals belonging to the  $i$ th species ( $\frac{N_i}{N}$ ).

$S$  = numbers of species encountered

$\sum$  = sum from species 1 to species  $S$

Equation (S2): The equation used to create Figure 5 of Shannon Diversity was as follows, with an  $r^2$  of 0.76:

$$eH' = 5.789 - 0.0010E + 0.0453S - 0.0046A - 0.134rh25 + 0.124rh50 - 0.0389rh75 - 0.0379rh100, \quad (S2)$$

where:

$eH'$  = Estimated Shannon diversity index

$E$  = Elevation

$S$  = Slope

$A$  = Aspect

rh25: relative height of 25% of the canopy density

rh50: relative height of 50% of the canopy density

rh75: relative height of 75% of the canopy density

rh100: Mean canopy height within the footprint

This equation was used in ENVI's band math to calculate the new layer of Shannon diversity.
